# Supplementary material for: Chromogenic agents built around a multifunctional double-triazine framework for enzymatically triggered cross-linking under physiological conditions
Source: Royal Society of Chemistry journal article supplement (doi:10.1039/c9nj06187h), 2020-01-01

Electronic Supplementary Information for:

**Chromogenic agents built around a multifunctional double-triazine framework for enzymatically triggered cross-linking under physiological conditions**

Hikaru Fujita, Yunlong Zhang, Zhiyuan Wu and Jonathan S. Lindsey\*

**Table of Contents**

| <b>Topic</b>                                | <b>Page number</b> |
|---------------------------------------------|--------------------|
| 1. Single-crystal X-ray data for <b>6-β</b> | S-1                |
| 2. Spectral data for new compounds          | S-2                |

**1. Single-crystal X-ray data for 6-β  
(1-acetyl-5-benzyloxy-1*H*-indol-3-yl 2,3,4,6-tetra-*O*-acetyl-β-*D*-glucopyranoside)**

|                                                    |                                                  |
|----------------------------------------------------|--------------------------------------------------|
| CCDC registry                                      | 1902485                                          |
| Formula                                            | C <sub>31</sub> H <sub>33</sub> NO <sub>12</sub> |
| Formula Weight (g/mol)                             | 611.58                                           |
| Crystal Dimensions (mm)                            | 0.142×0.252×0.351                                |
| Crystal System                                     | triclinic                                        |
| Space Group                                        | P 1                                              |
| Temperature (K)                                    | 100                                              |
| <i>a</i> (Å)                                       | 5.6782 (2)                                       |
| <i>b</i> (Å)                                       | 11.7351 (4)                                      |
| <i>c</i> (Å)                                       | 12.7603 (4)                                      |
| α (°)                                              | 115.2260 (9)                                     |
| β (°)                                              | 101.8176 (10)                                    |
| γ (°)                                              | 93.6185 (11)                                     |
| <i>V</i> (Å <sup>3</sup> )                         | 741.94 (4)                                       |
| Number of reflections to determine final unit cell | 102                                              |
| Min and Max 2θ for cell determination (°)          | 3.898, 44.78                                     |
| <i>Z</i>                                           | 1                                                |
| <i>F</i> (000)                                     | 322                                              |
| ρ (g/cm <sup>3</sup> )                             | 1.369                                            |
| λ (Å, Mo Kα)                                       | 0.71073                                          |
| μ (mm <sup>-1</sup> )                              | 0.106                                            |
| Max 2θ for data collection (°)                     | 56.48                                            |
| Measured fraction of data                          | 0.998                                            |
| Number of reflections measured                     | 21480                                            |
| Unique reflections measured                        | 7272                                             |
| R <sub>merge</sub>                                 | 2.05%                                            |
| Number of parameters in least-squares              | 402                                              |
| R <sub>1</sub>                                     | 0.0291                                           |
| wR <sub>2</sub>                                    | 0.0691                                           |
| R <sub>1</sub> (all data)                          | 0.0328                                           |
| wR <sub>2</sub> (all data)                         | 0.0710                                           |

## 2. Spectral data for new compounds

2, <sup>1</sup>H NMR (400 MHz, CDCl<sub>3</sub>)

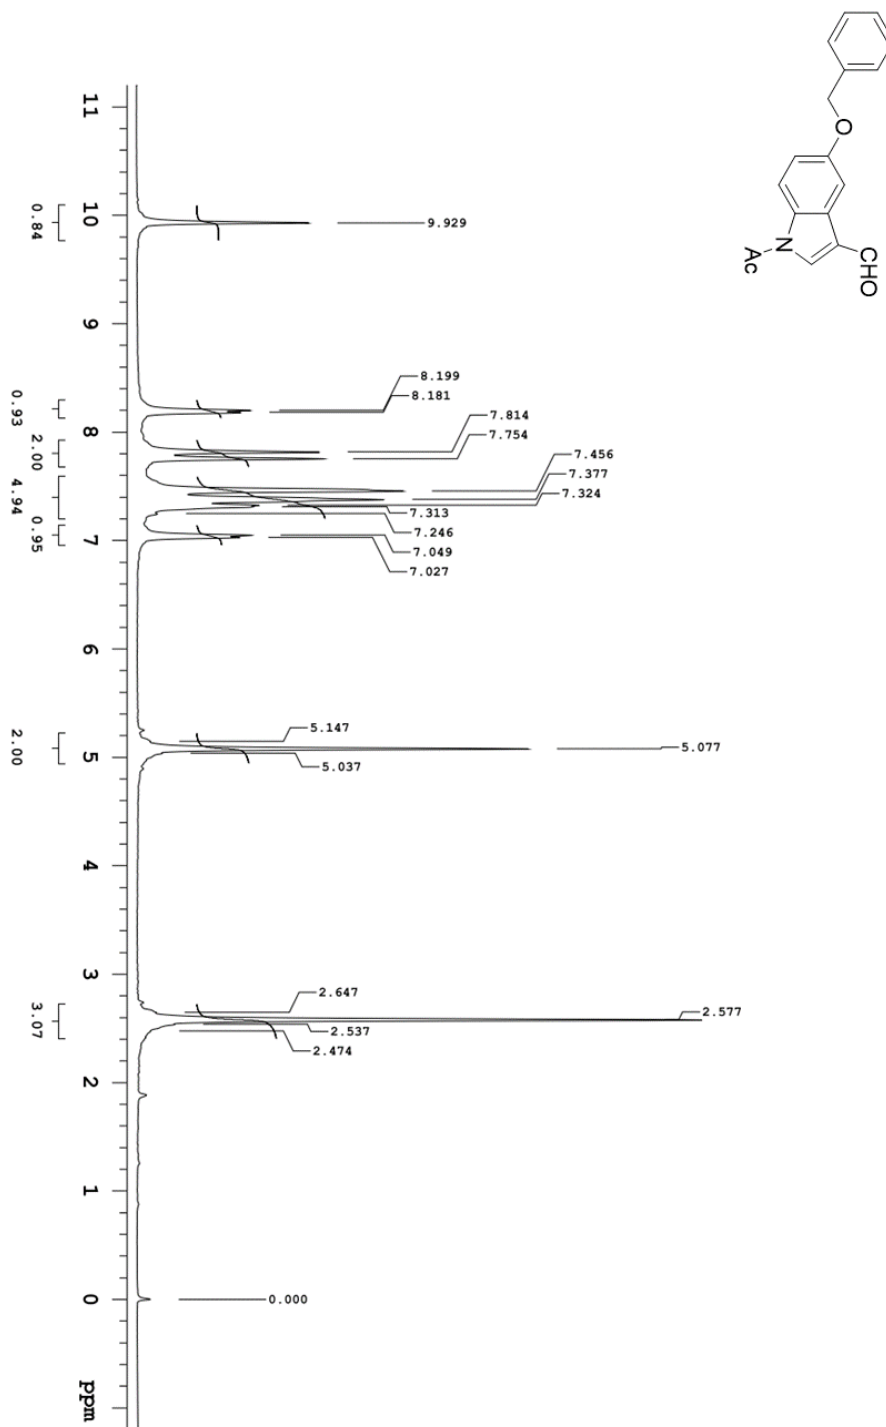

2, <sup>13</sup>C NMR (100 MHz, CDCl<sub>3</sub>)

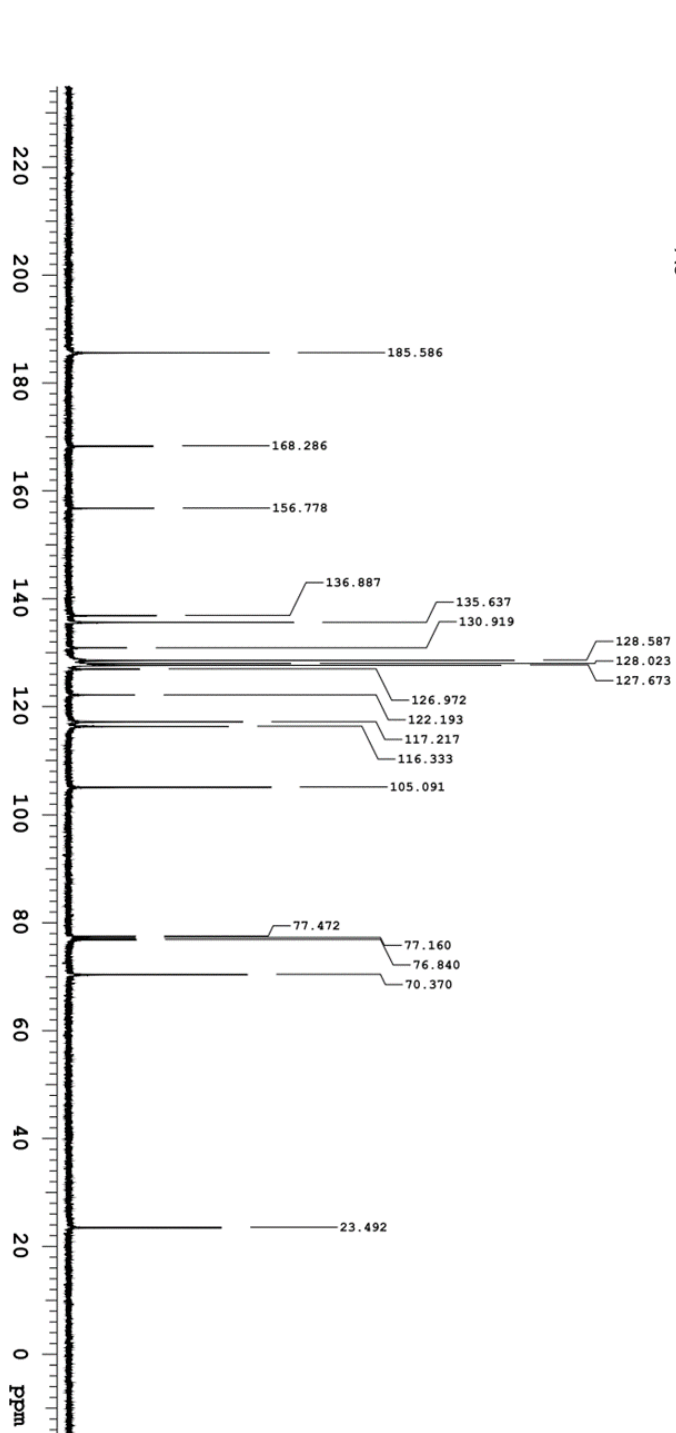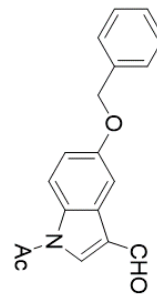

3, <sup>1</sup>H NMR (300 MHz, CDCl<sub>3</sub>)

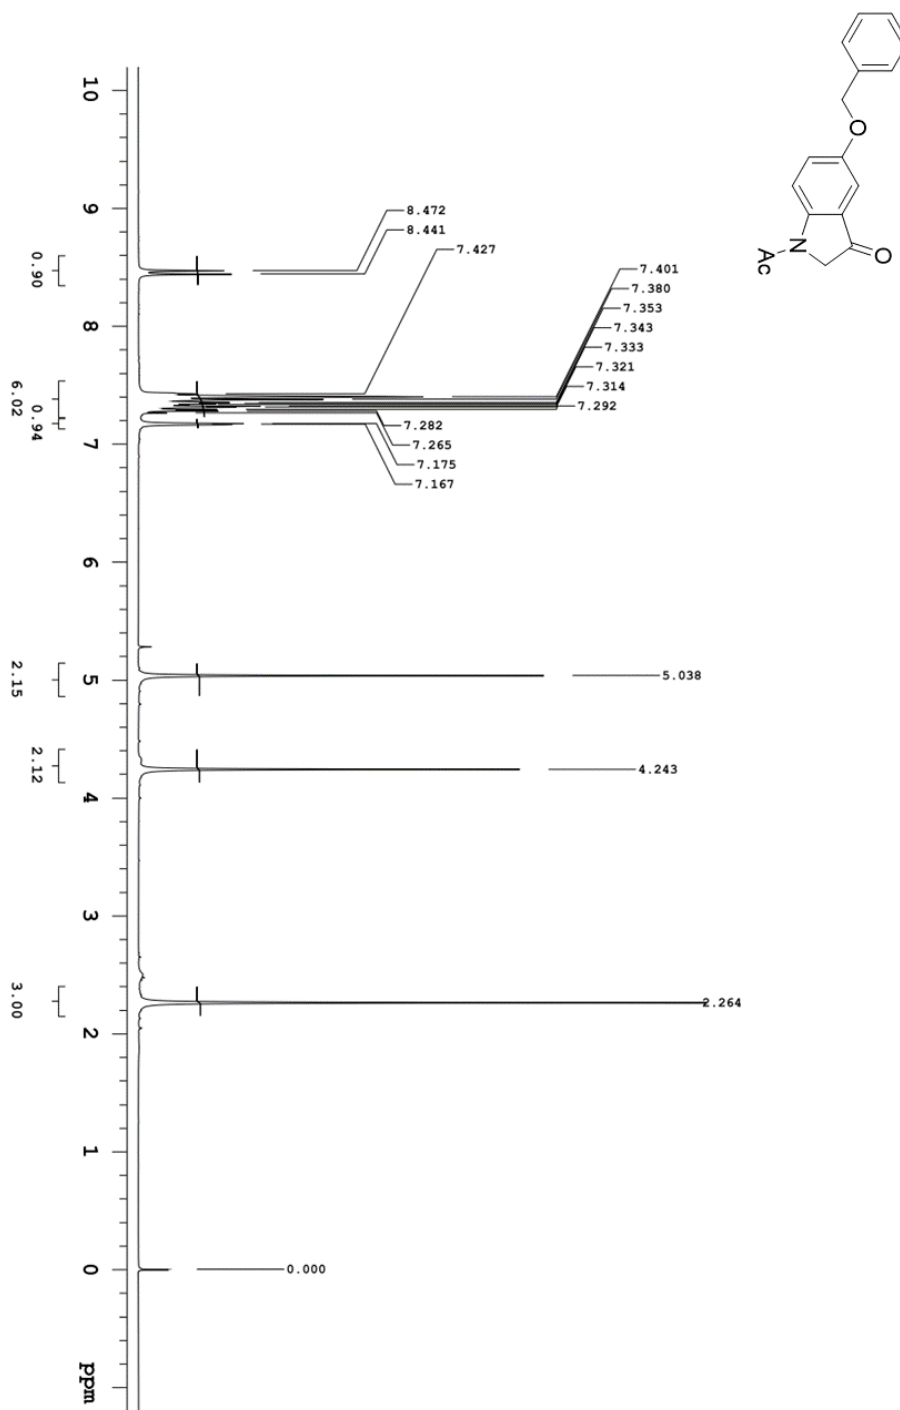

3, <sup>13</sup>C NMR (75 MHz, CDCl<sub>3</sub>)

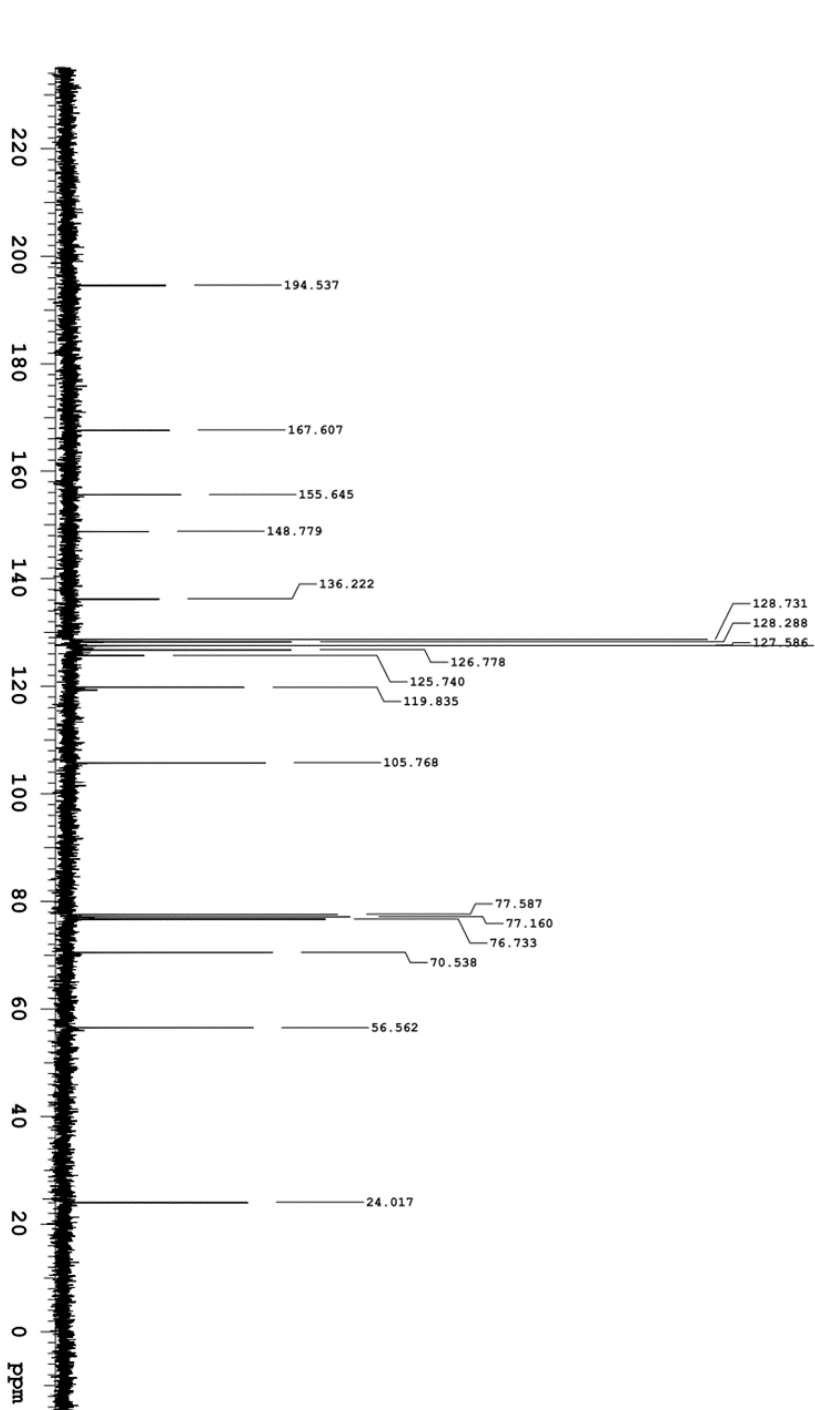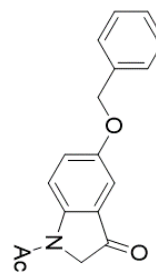

6- $\beta$ ,  $^1\text{H}$  NMR (700 MHz,  $\text{CDCl}_3$ )

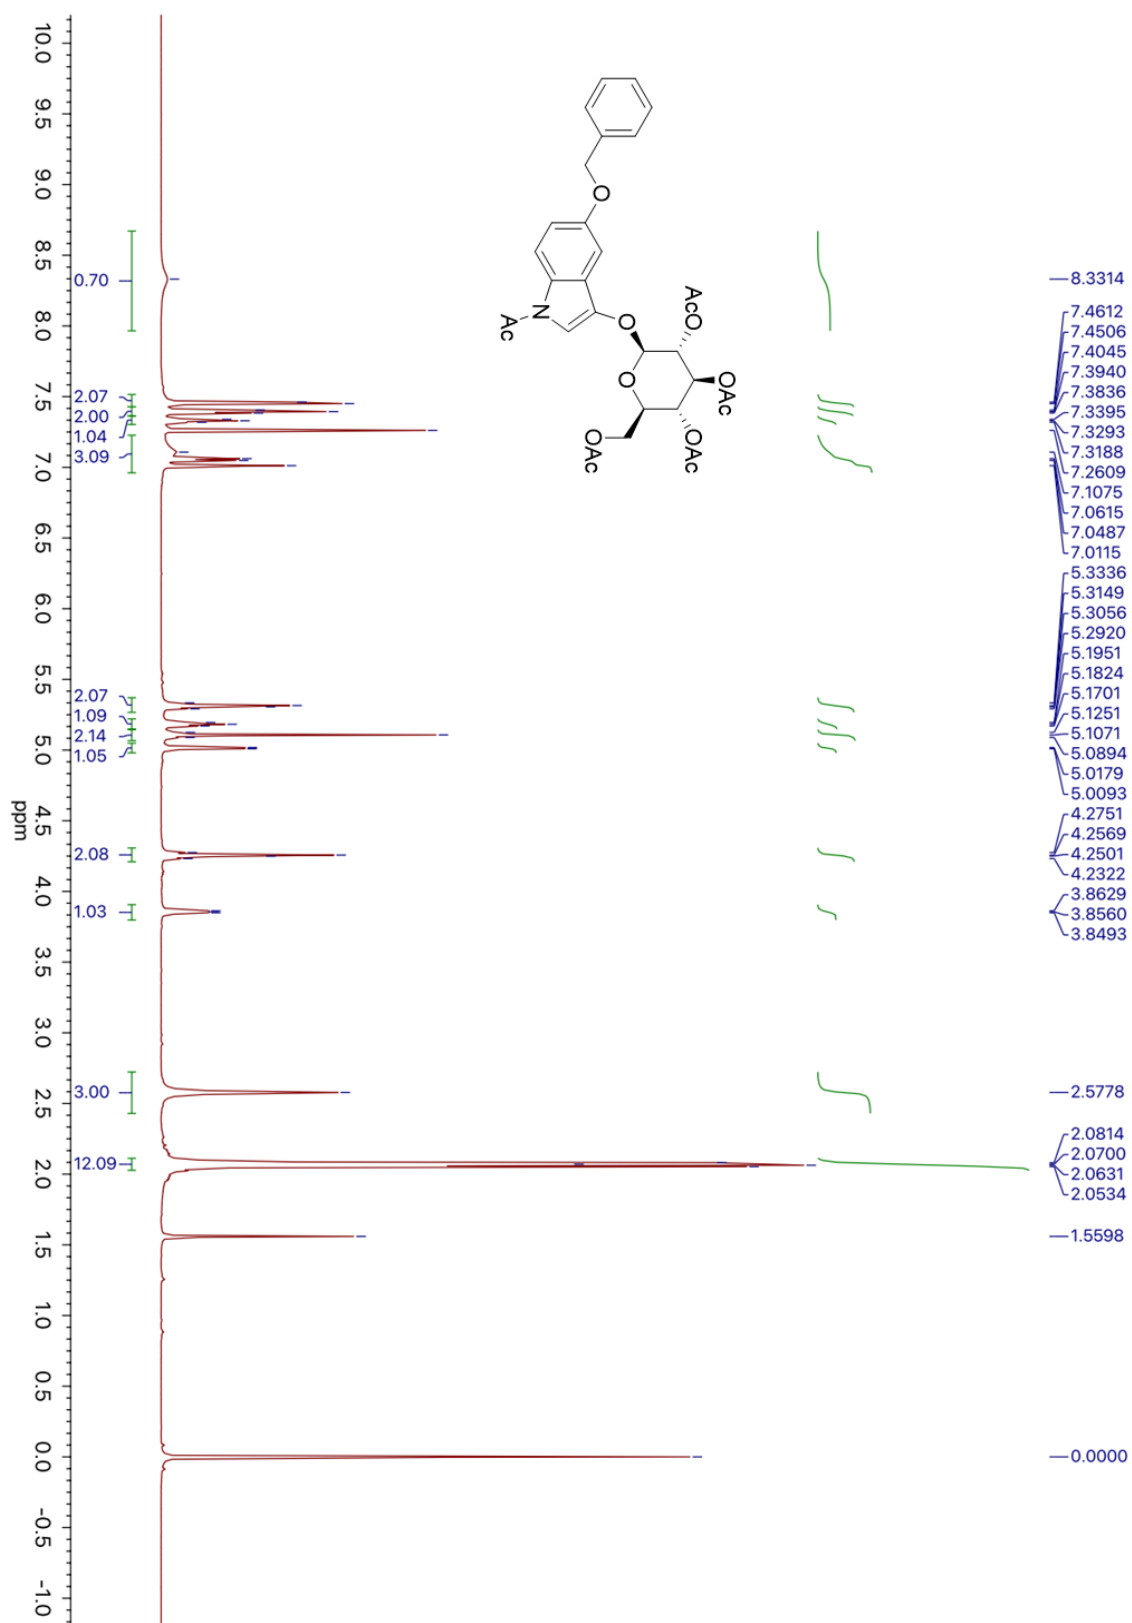

6- $\beta$ ,  $^1\text{H}$  NMR (700 MHz,  $\text{CDCl}_3$ ), zoomed-in version

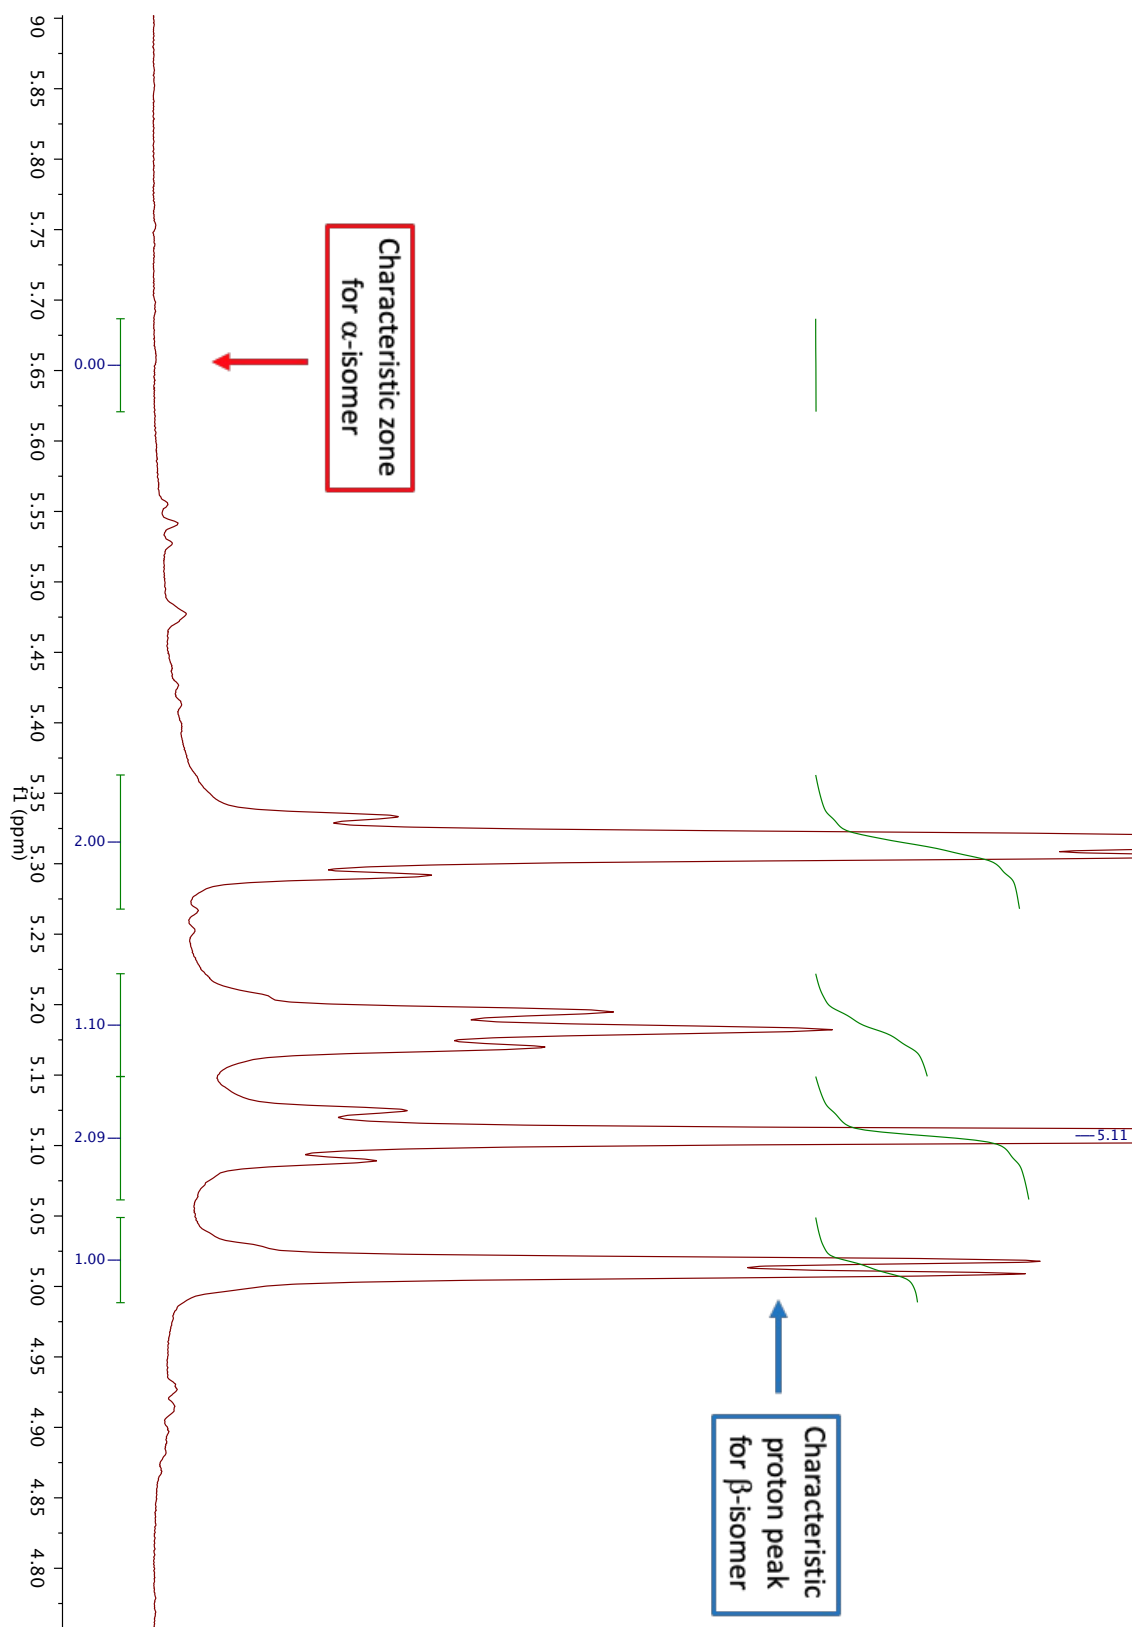

6- $\beta$ ,  $^{13}\text{C}$  NMR (100 MHz,  $\text{CDCl}_3$ )

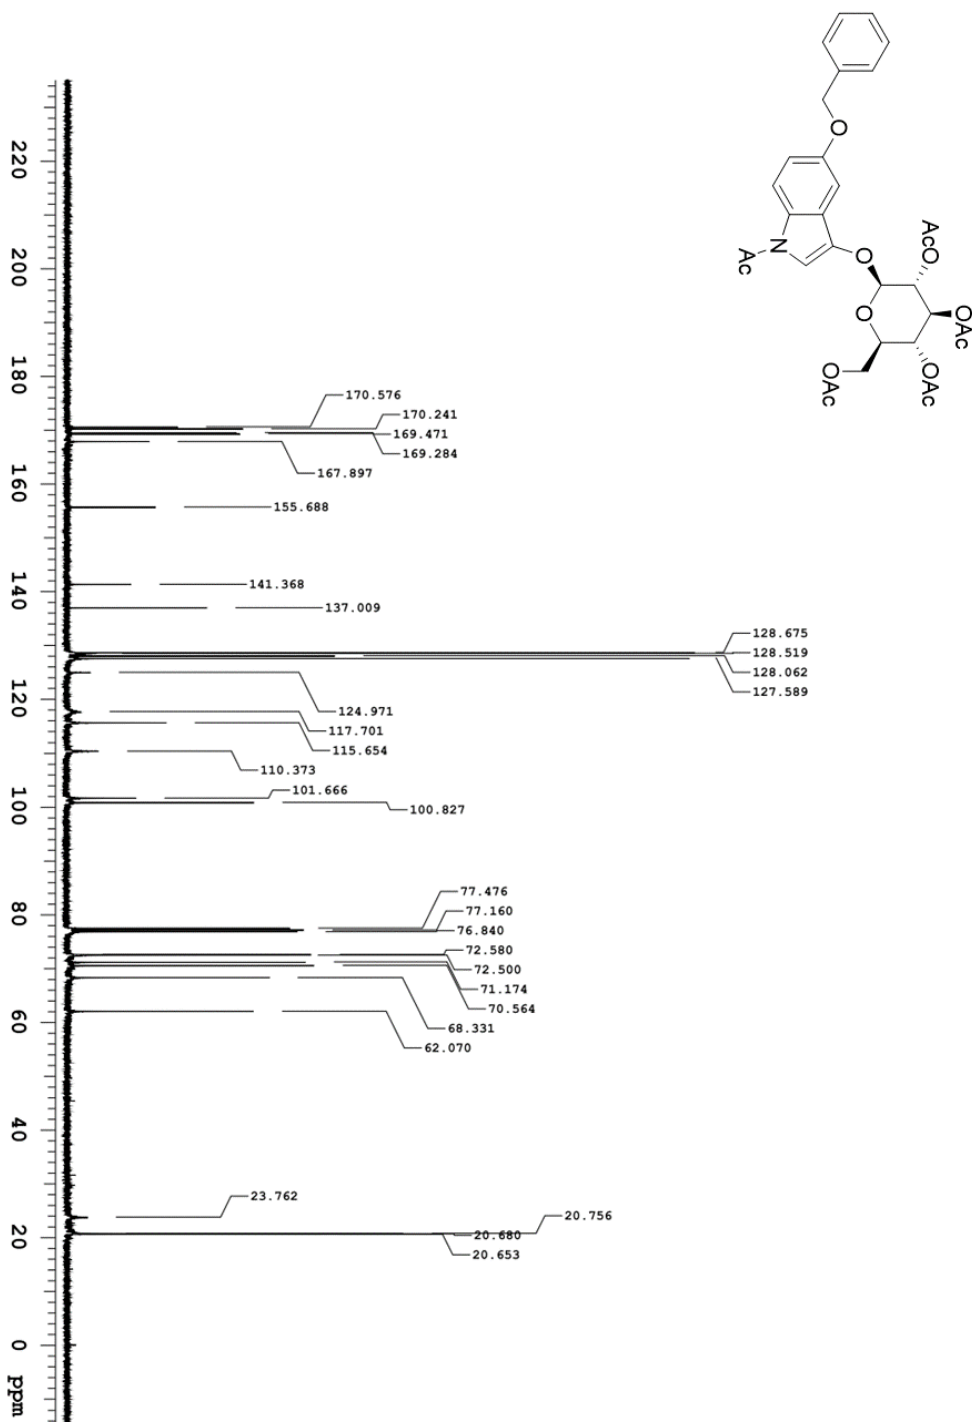



**6- $\alpha$** ,  $^1\text{H}$  NMR (700 MHz,  $\text{CDCl}_3$ )

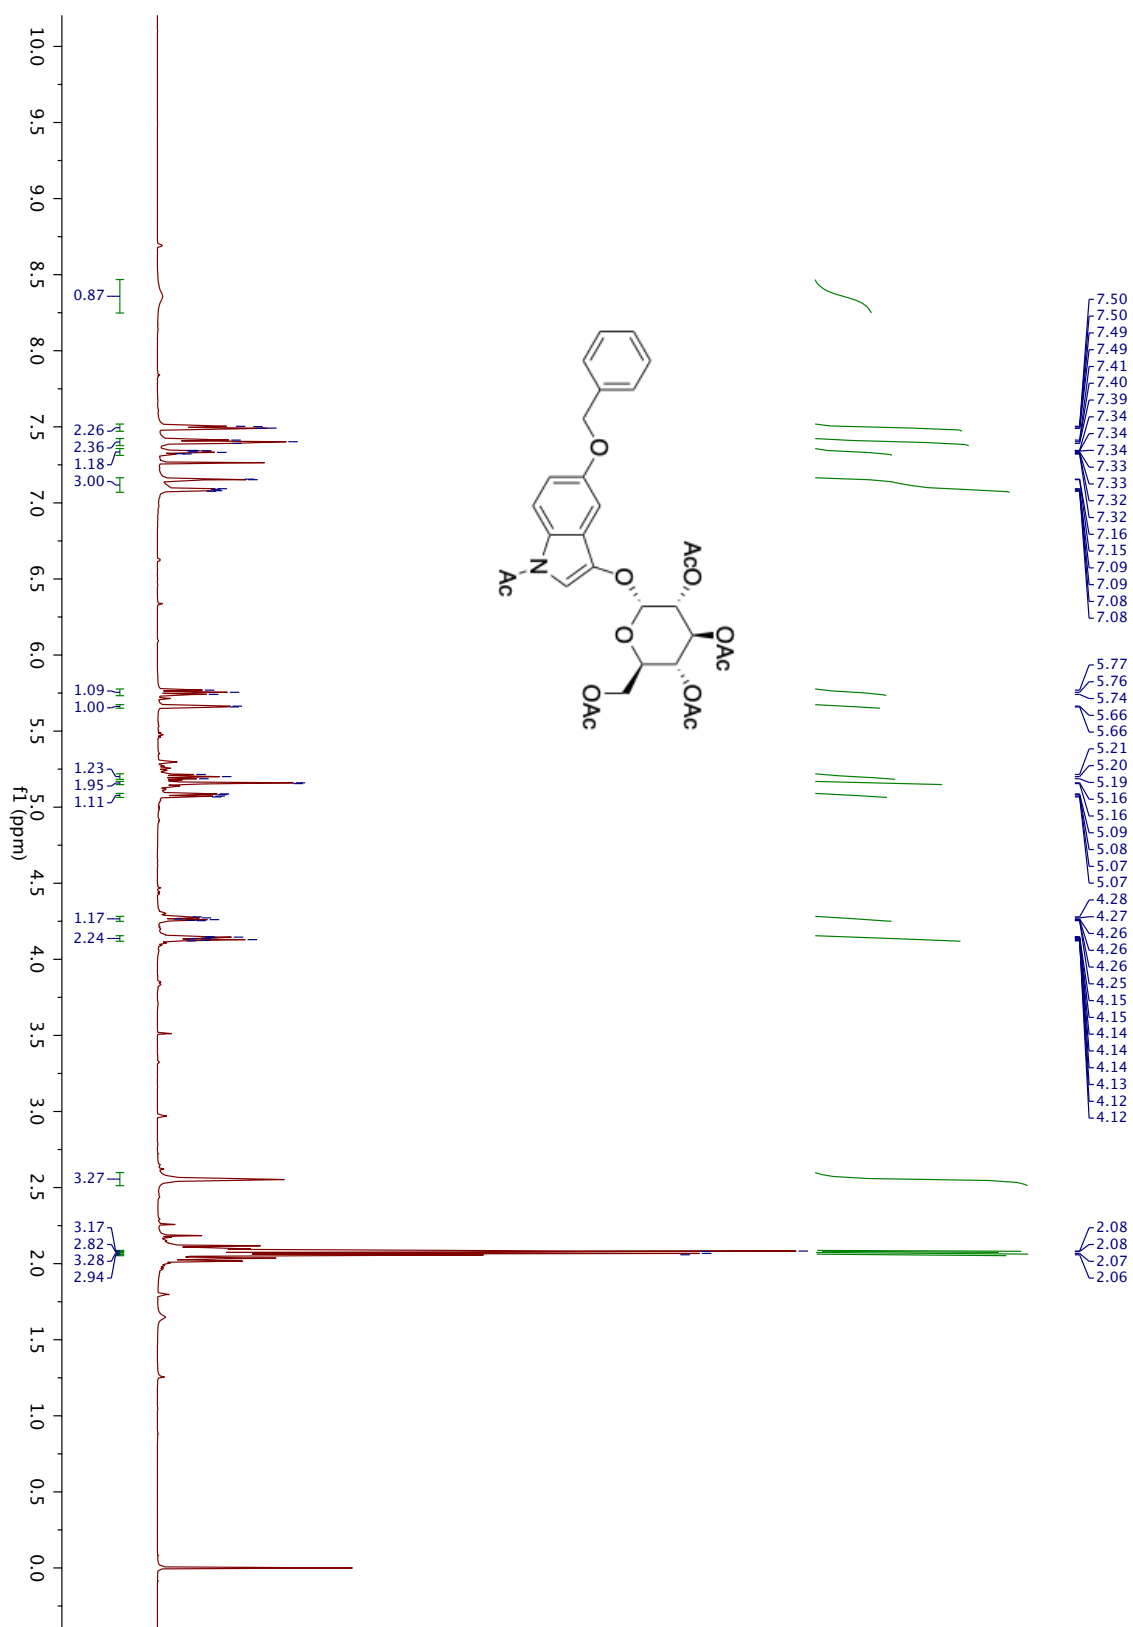

9, <sup>1</sup>H NMR (400 MHz, CD<sub>3</sub>OD)

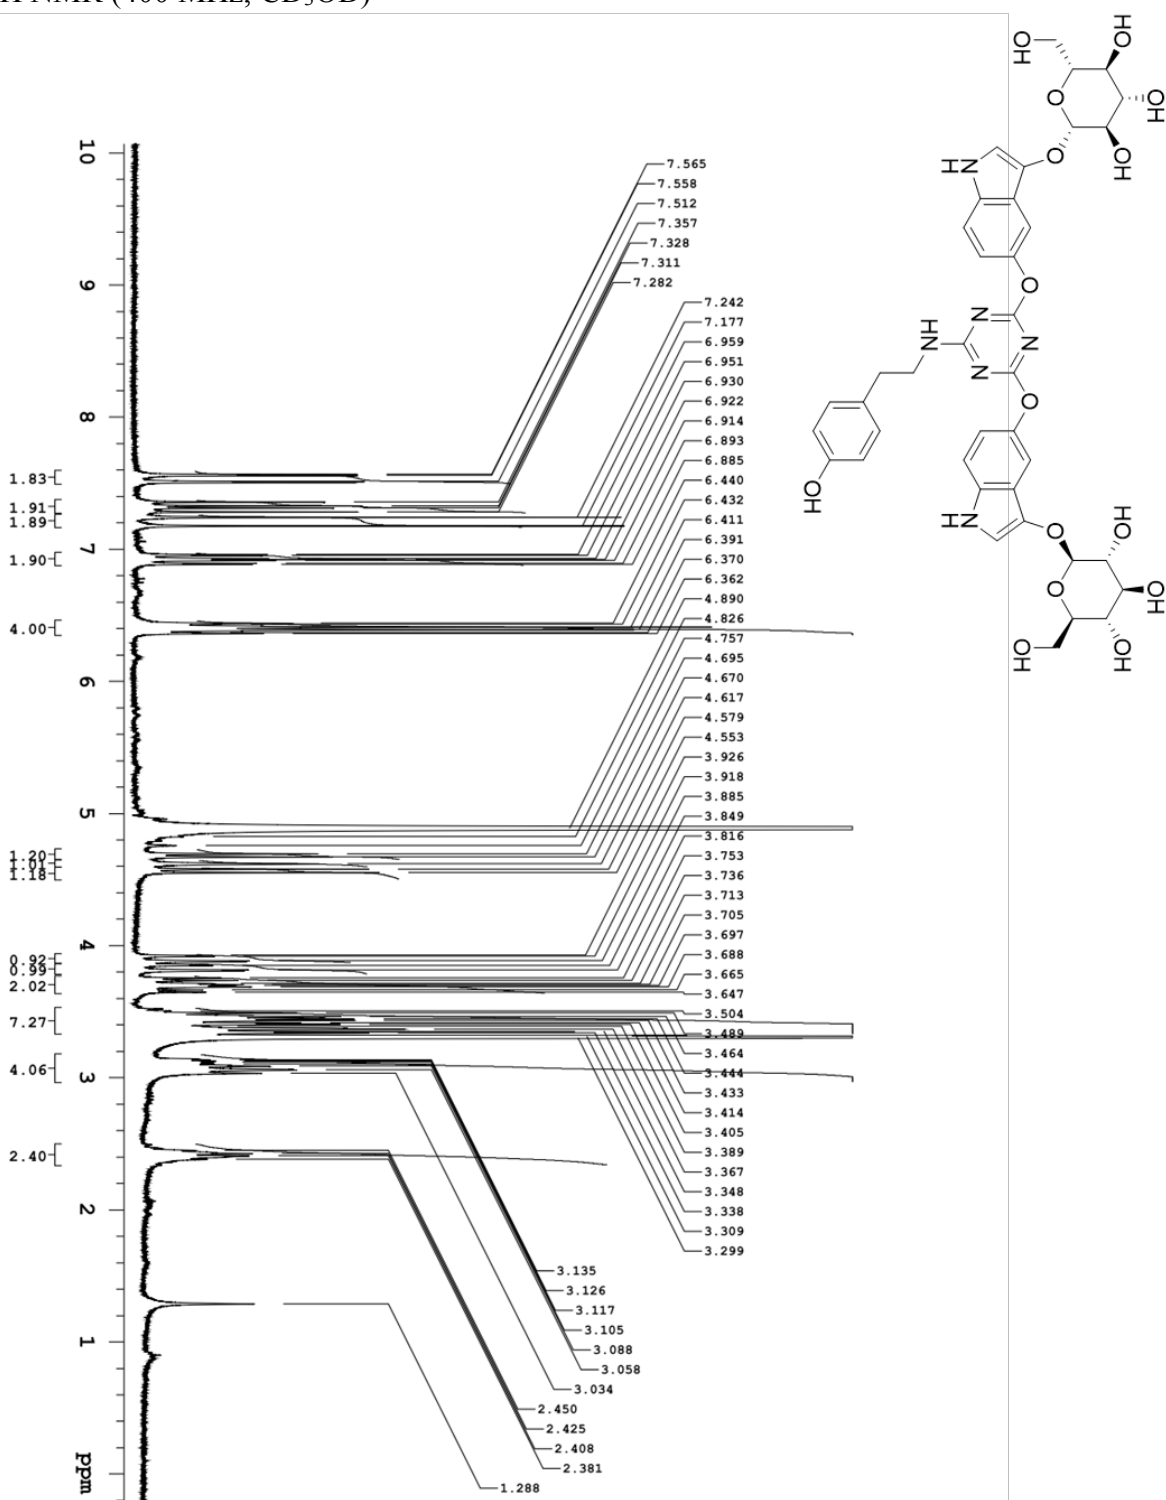

9, <sup>13</sup>C NMR (100 MHz, CD<sub>3</sub>OD)

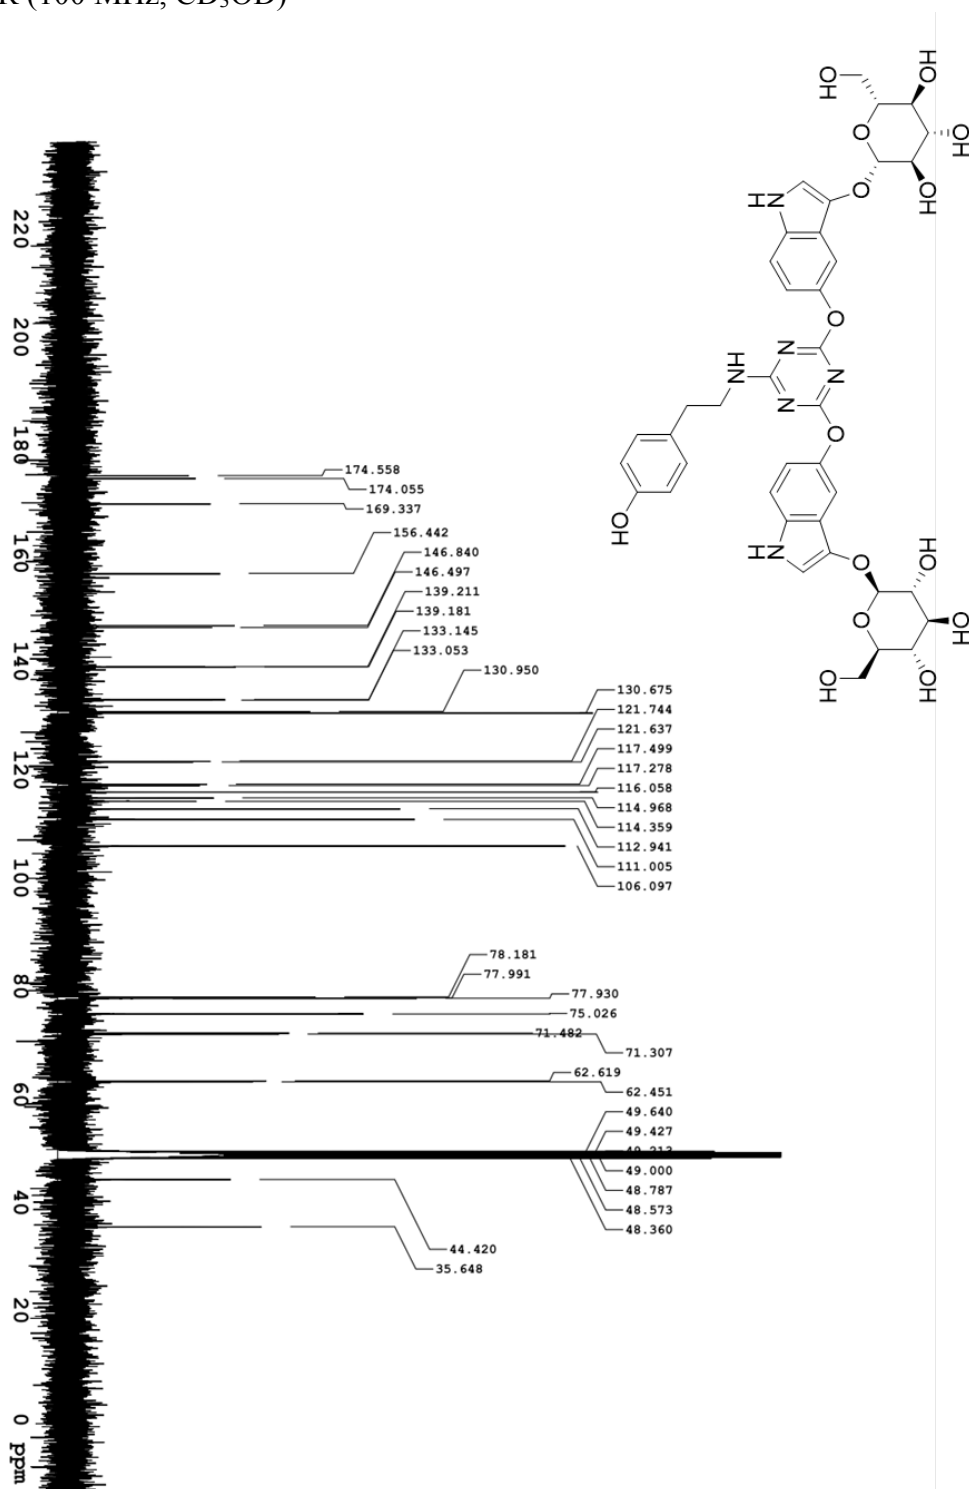

11, <sup>1</sup>H NMR (400 MHz, CD<sub>3</sub>OD)

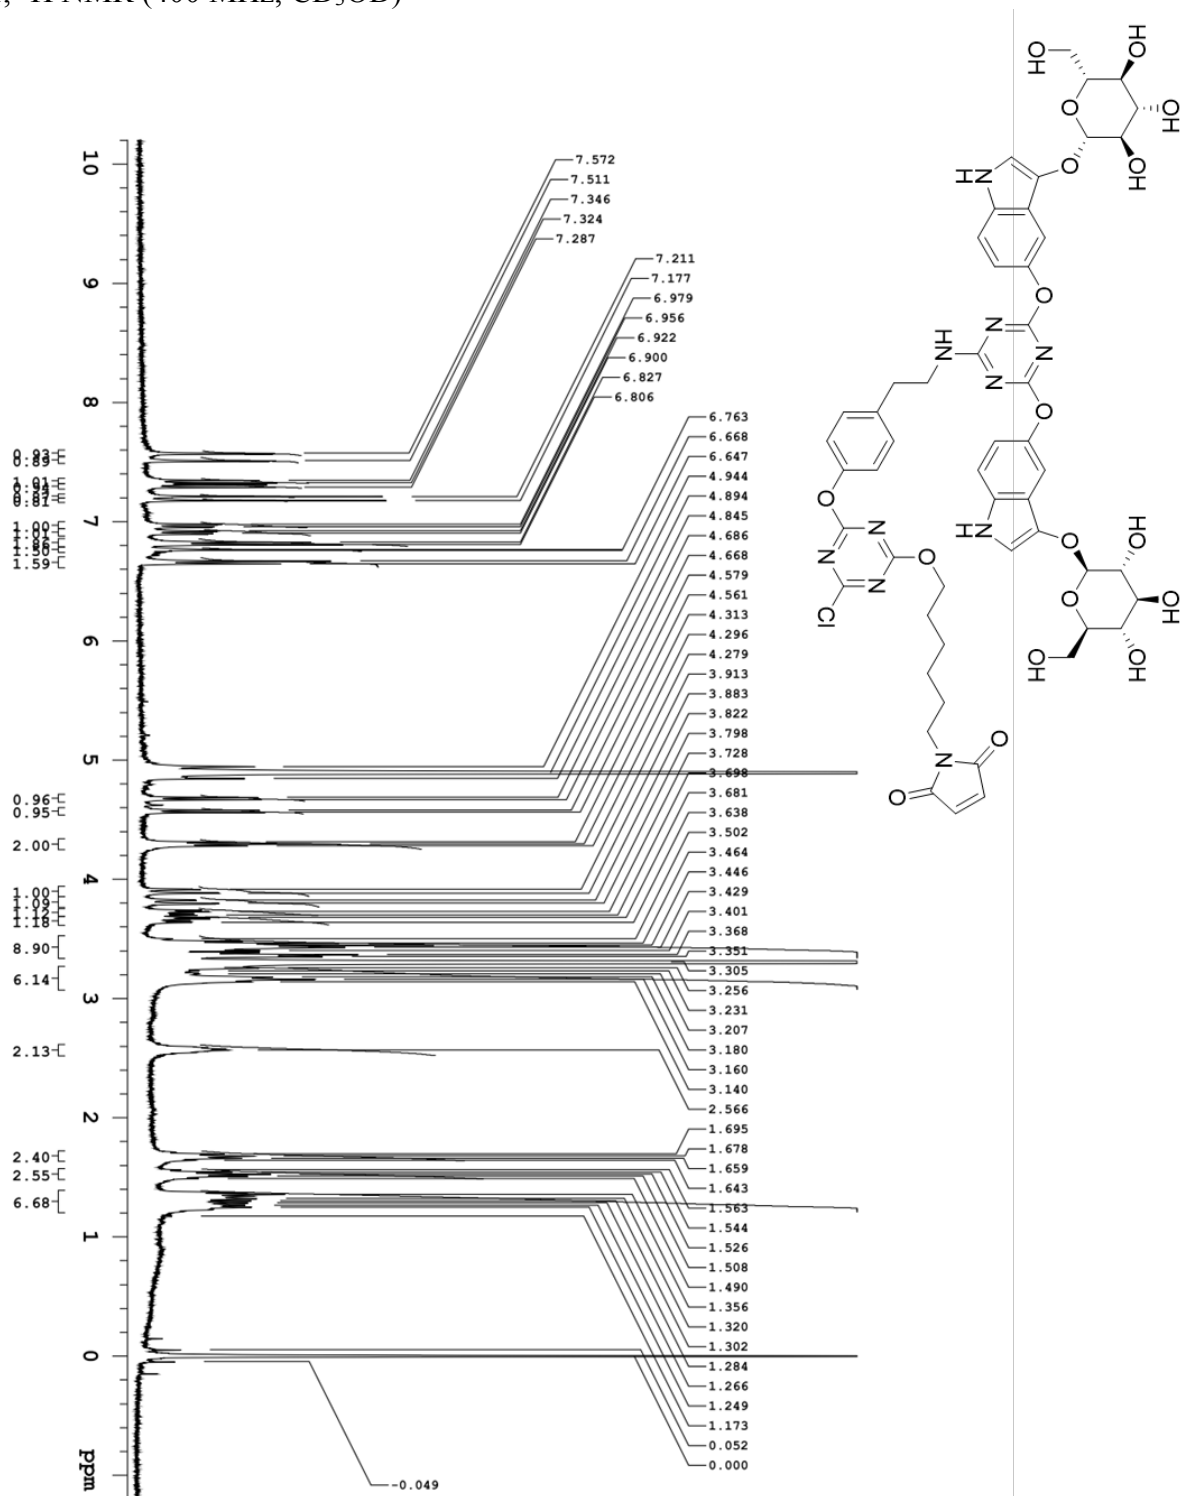

11, <sup>1</sup>H NMR (100 MHz, CD<sub>3</sub>OD/CD<sub>3</sub>CN)

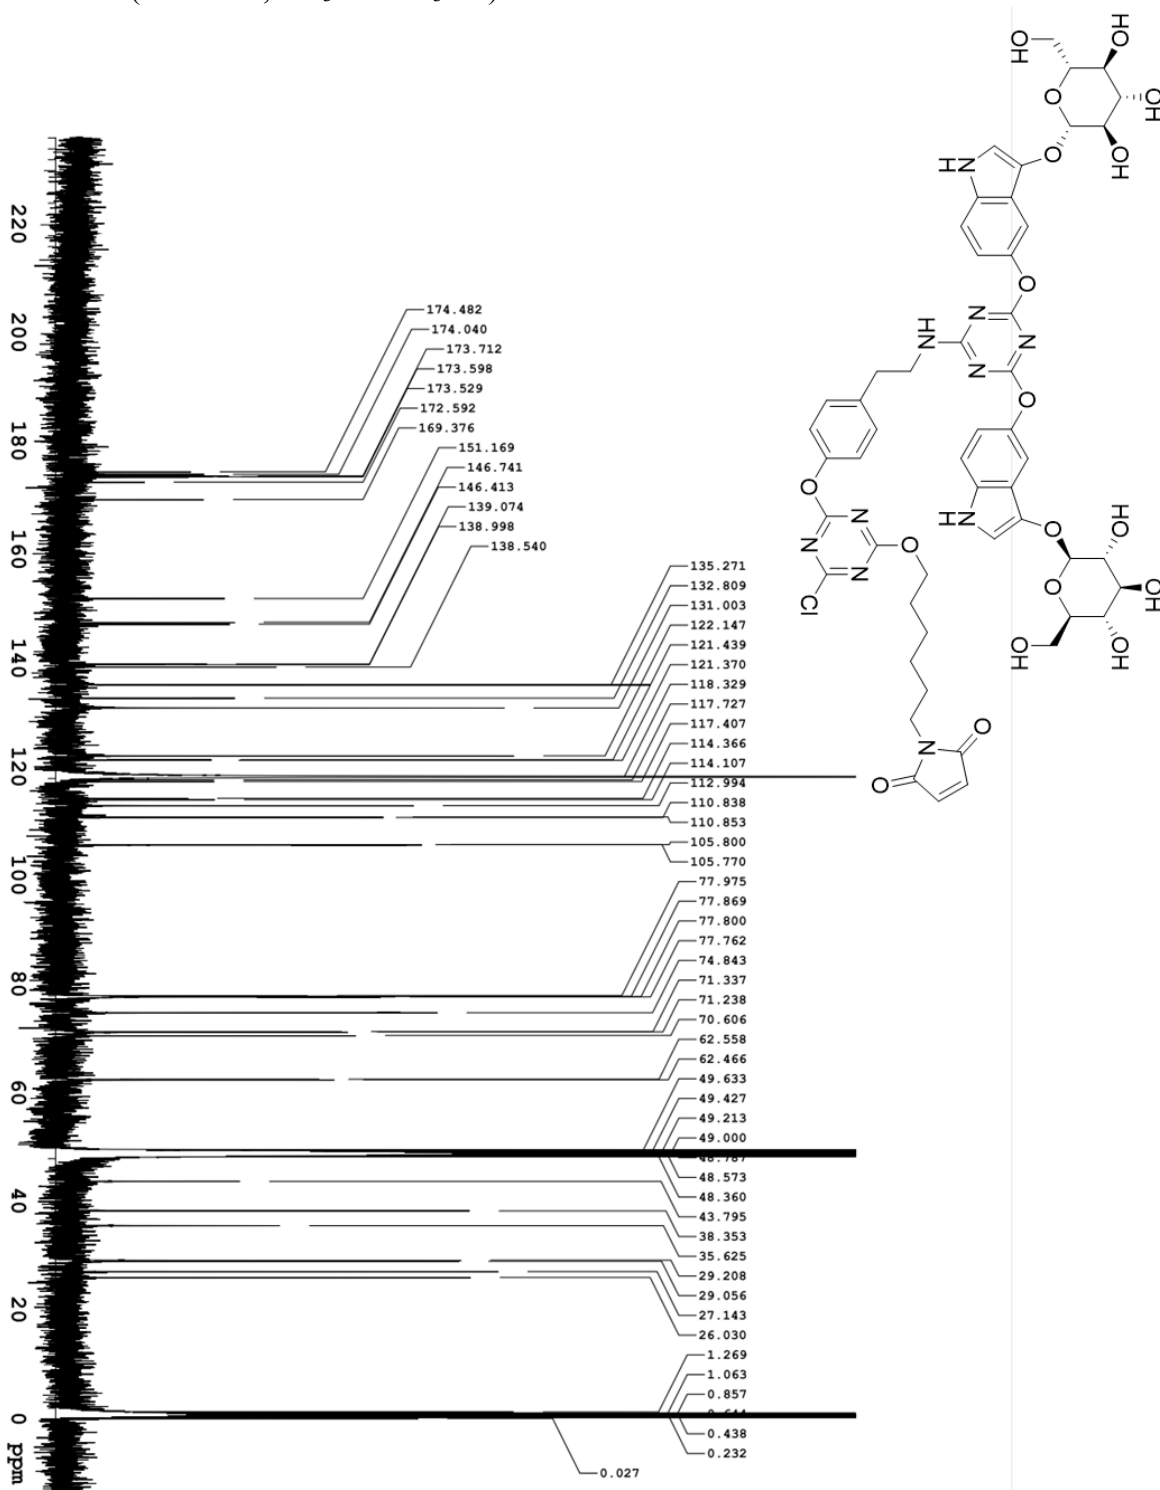



18,  $^{13}\text{C}$  NMR (175 MHz,  $\text{CDCl}_3$ )

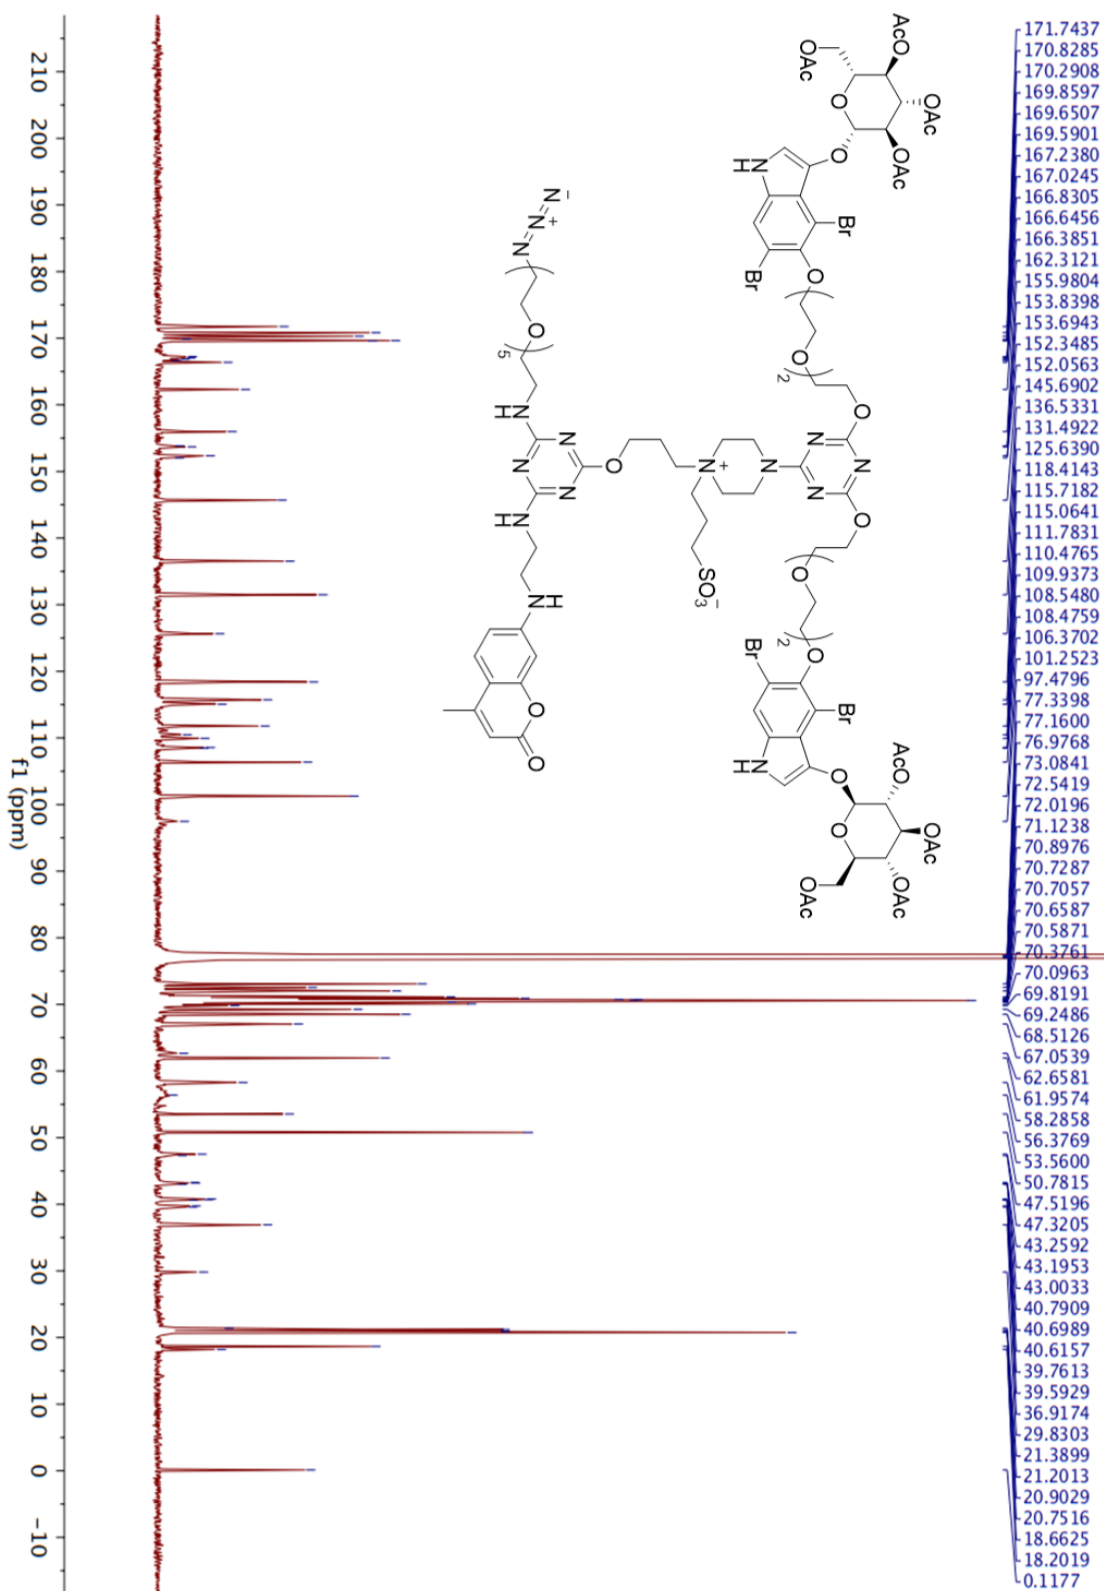

1, <sup>1</sup>H NMR [700 MHz, (CD<sub>3</sub>)<sub>2</sub>SO]

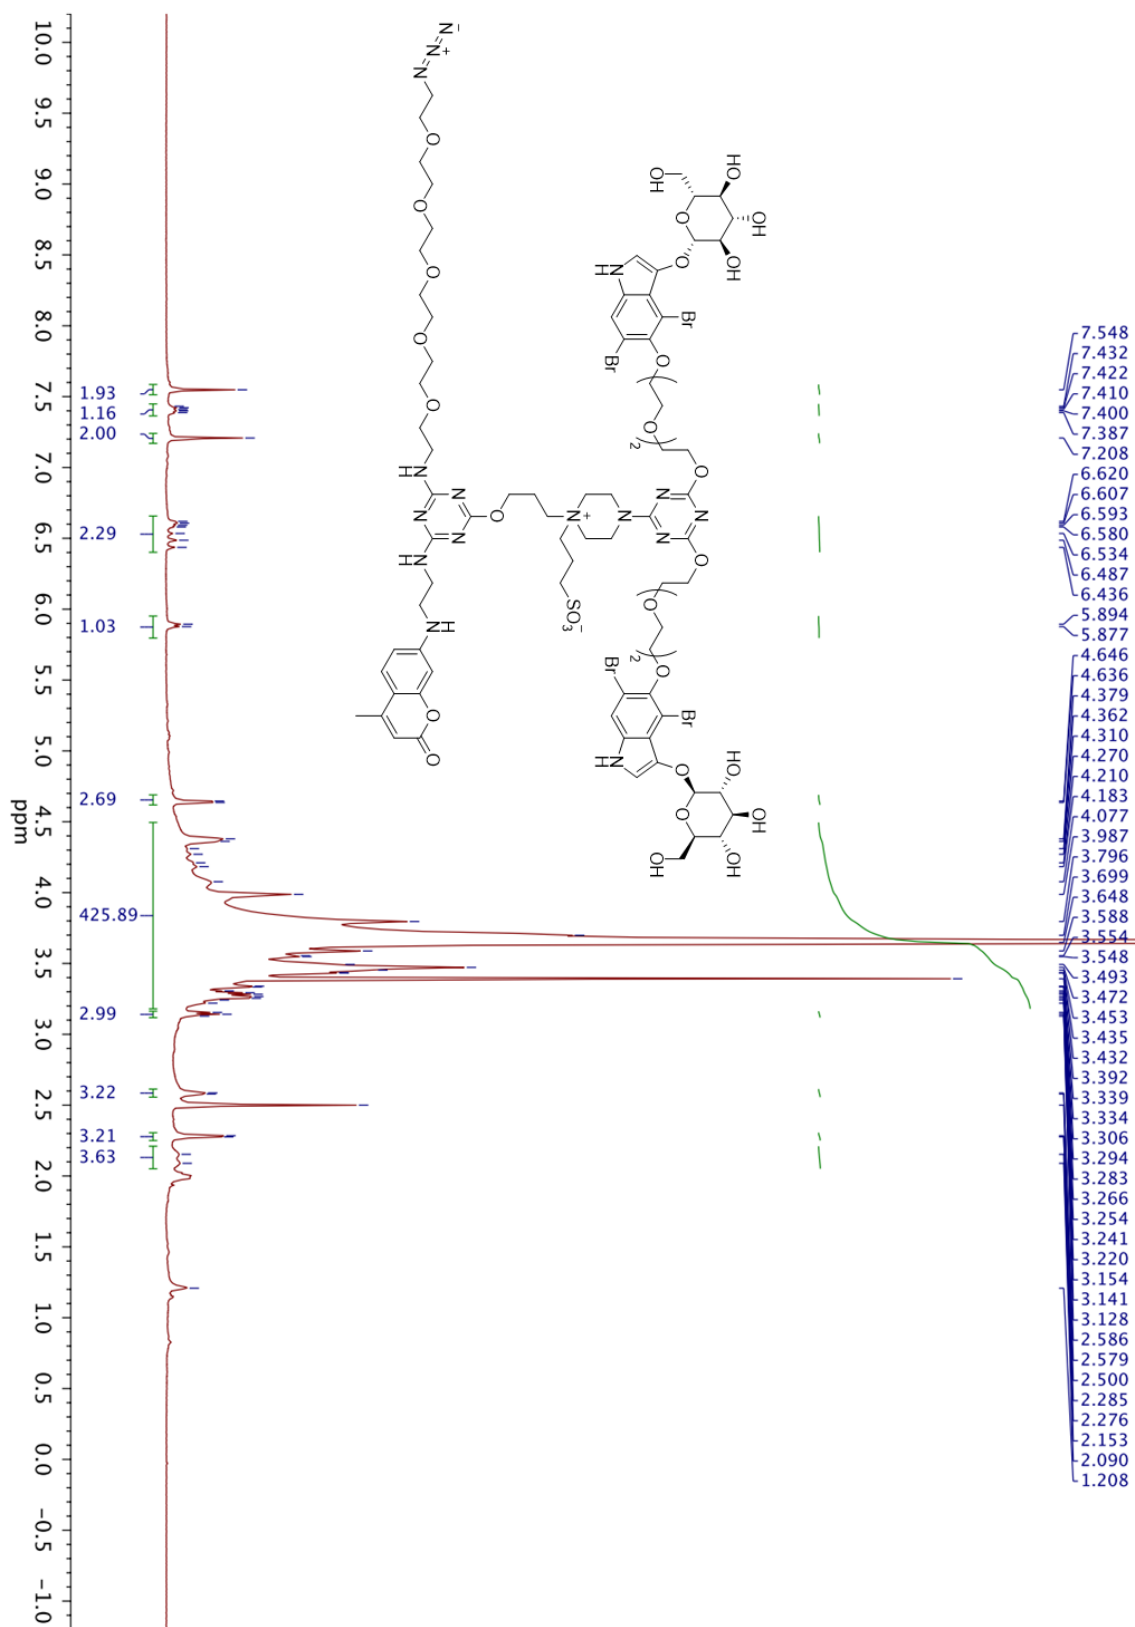



1, <sup>13</sup>C NMR [175 MHz, (CD<sub>3</sub>)<sub>2</sub>SO]

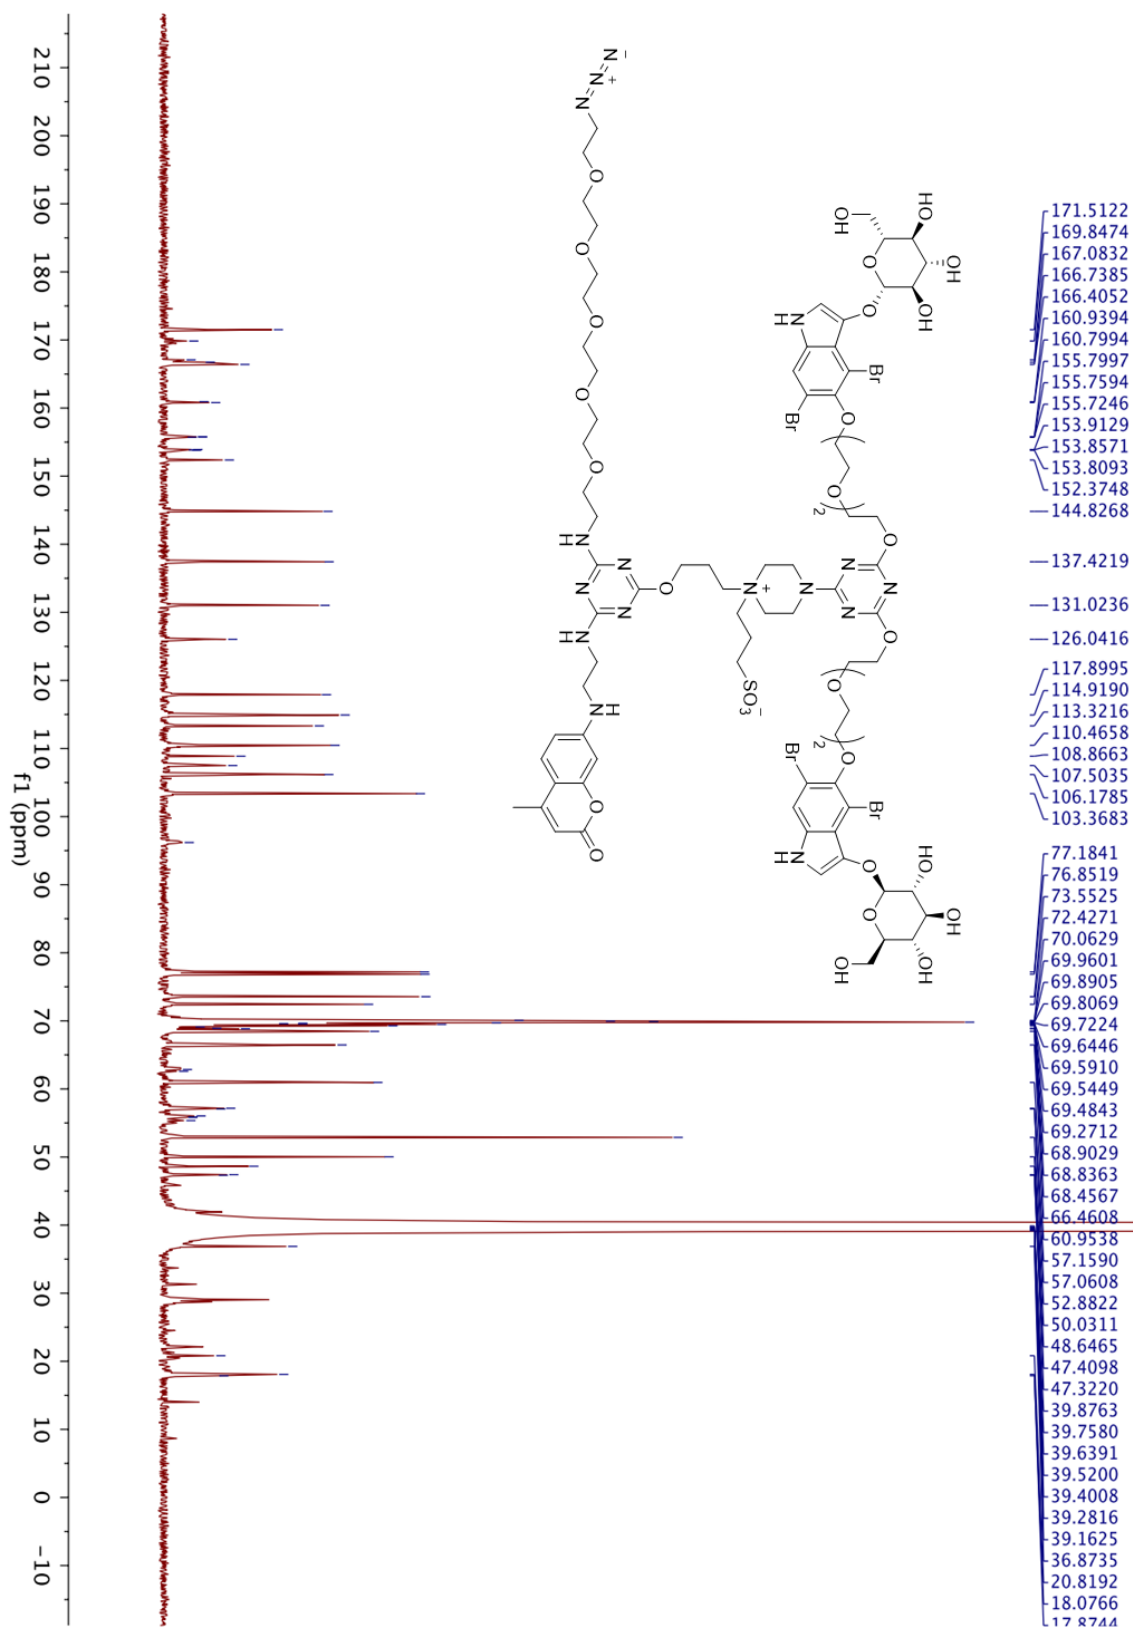

Supplement: c9nj06187h1.pdf [file c9nj06187h1.pdf]
